# Supplementary material for: Mode transitions in Northern Hemisphere Glaciation: Co-evolution of millennial and orbital variability in Quaternary climate
Source: Copernicus journal article supplement (doi:10.5194/cp-2016-30), 2016-03-24
Supplement: Supplementary file 1 [file cp-2016-30-supplement.pdf]

The supplementary materials consists of seven figures:

### **Supplemental Figure Captions**

Figure S1. Comparison of bulk carbonate  $\delta^{18}\text{O}$  (black) and %lithic counts (red) for the upper 20 m of Site U1308. Three glacial periods were counted for IRD at Site 609 (MIS2-4) and U1308 (MIS6 and MIS8) (Obrochta et al., 2014). Note the good correspondence between increases in %lithics and decreases in bulk carbonate  $\delta^{18}\text{O}$ .

Figure S2. Benthic  $\delta^{18}\text{O}$  minus bulk  $\delta^{18}\text{O}$  for the last 3.2 Ma at Site U1308 plotted on a log scale. The divergence in benthic and bulk  $\delta^{18}\text{O}$  records are indicative of IRD events and a source of carbonate to Site U1308. Selected marine isotope stages are labelled.

Figure S3. Comparison of bulk carbonate (red) and benthic (black)  $\delta^{18}\text{O}$  for the period from 1800 to 3200 ka. Note the general parallel trends in this interval. The asterisks denote times when the bulk carbonate  $\delta^{18}\text{O}$  diverges from the benthic  $\delta^{18}\text{O}$  signal in glacial MIS 100, 98, 88, 86, 82, 78, 72, 70 and 68.

Figure S4. Comparison of bulk carbonate (red) and benthic (black)  $\delta^{18}\text{O}$  for the period from 650 to 1800 ka. The lows in bulk carbonate  $\delta^{18}\text{O}$  tend to occur on glacial terminations and inceptions.

Figure S5. Comparison of bulk carbonate (red) and benthic (black)  $\delta^{18}\text{O}$  for the period from 0 to 650 ka. The lows in bulk carbonate  $\delta^{18}\text{O}$  that are less than  $-4\text{‰}$  are associated with Heinrich layers.

Figure S6. Location of sites relative to reconstructed ice sheets for MIS 5b (a), MIS 4 (b), and MIS 2 (c) based on numerical model of Kleman et al. (2013). Thick white lines represent geological constraints of the ice sheets. Figure modified after Kleman et al. (2013).

Figure S7. The position of Site U1308 (yellow dot) relative to the numerical model results of Löffverström et al. (2014). The arrows show the wind vectors in (800 hPa surface) and the 50% sea-ice margin in winter (blue) and summer (red). Model runs are for: (a) the present interglacial, (b) MIS 5b, (c) MIS 4 and (d) the last glacial maximum. Figure modified after Löffverström et al. (2014).

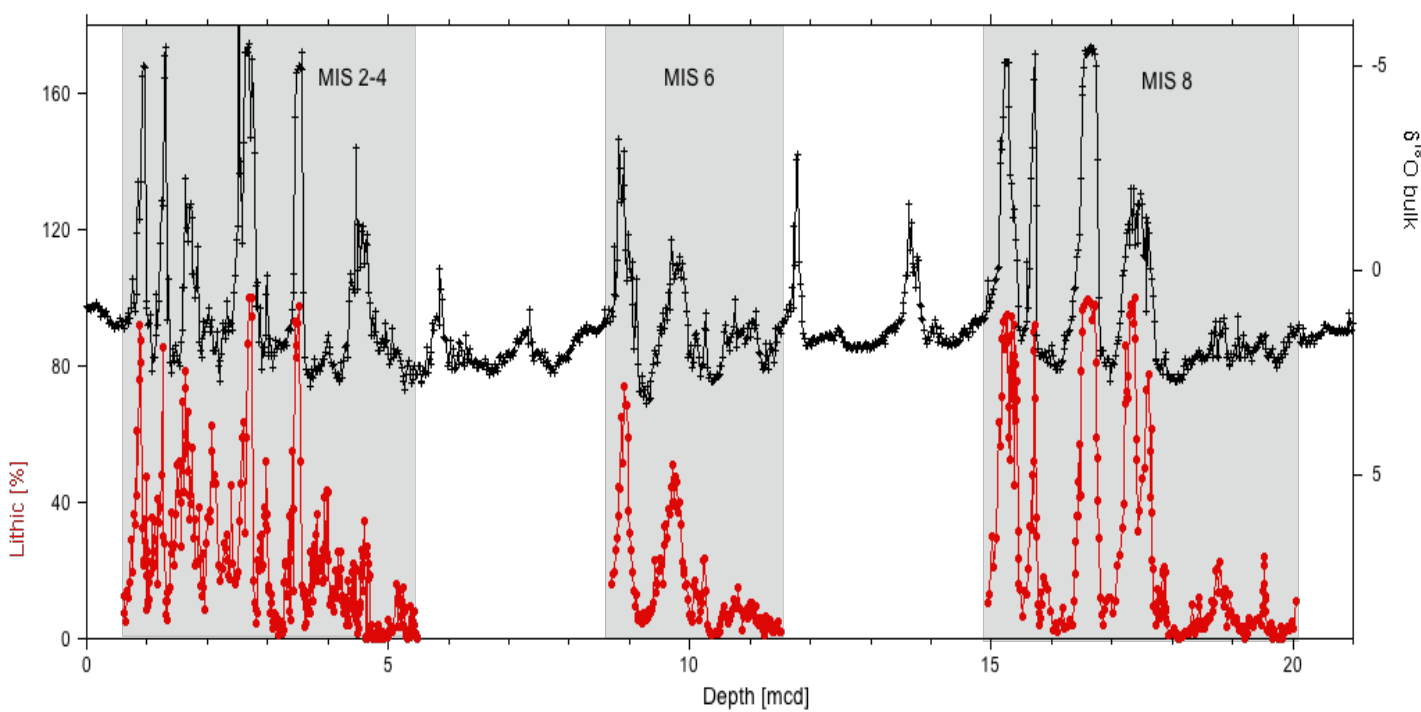

figS01

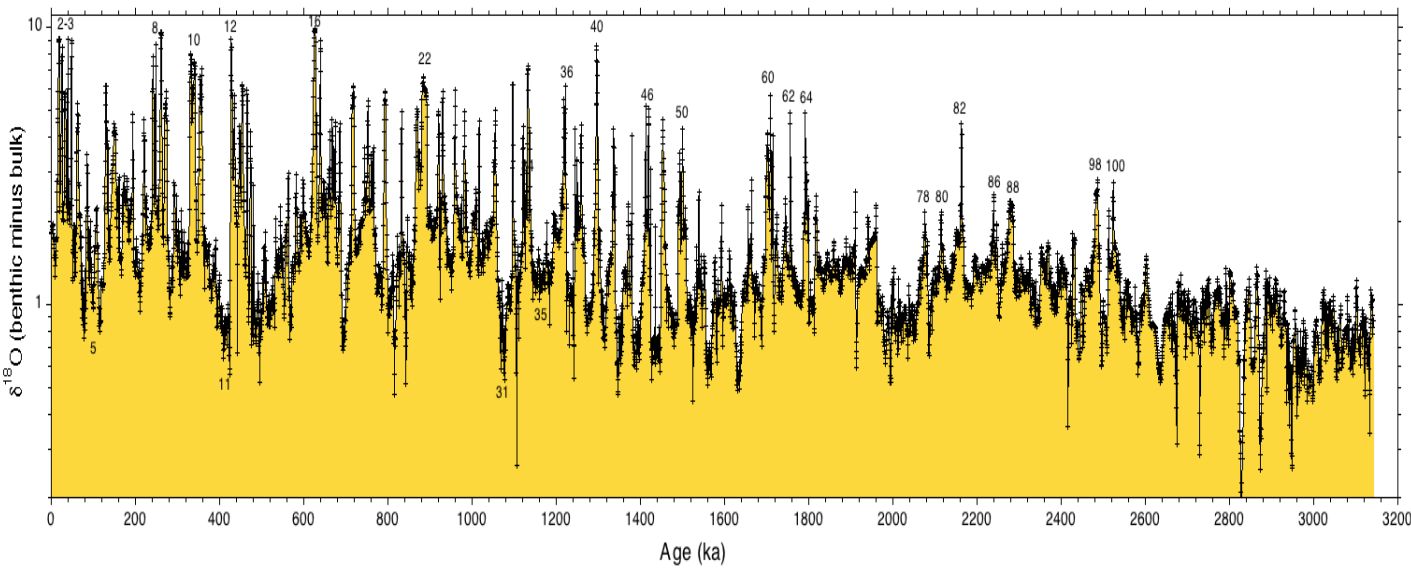

figS02

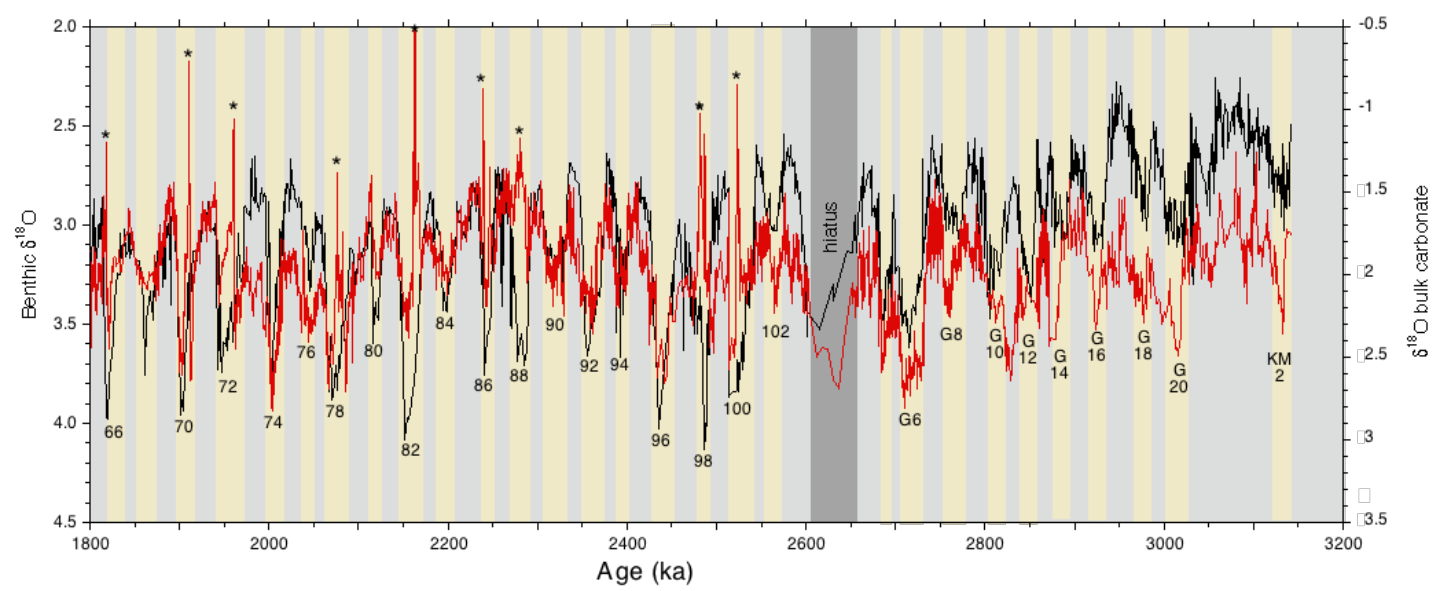

figS03

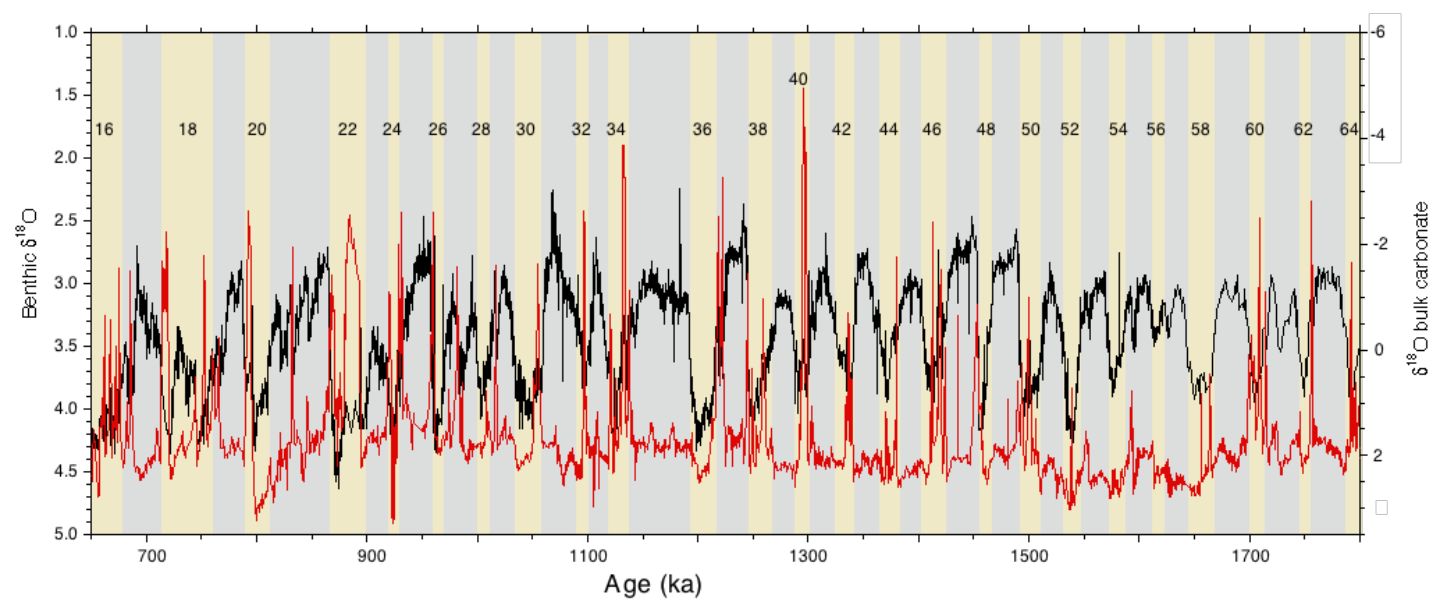

figS04

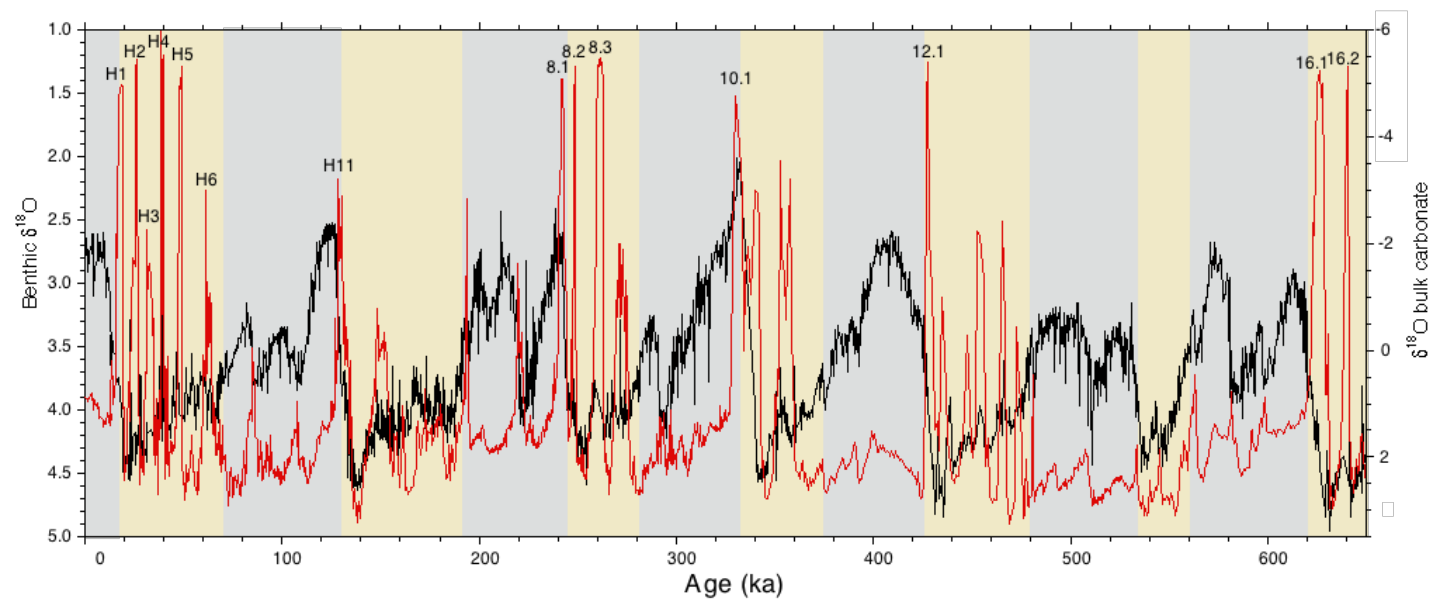

figS05

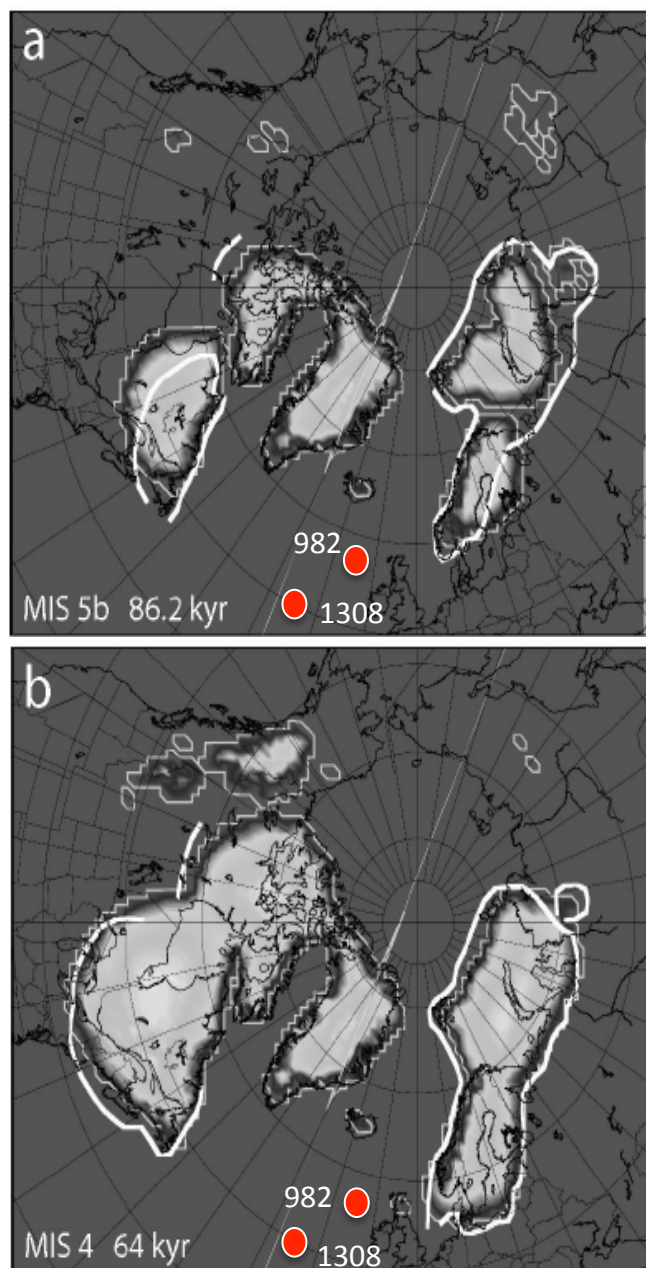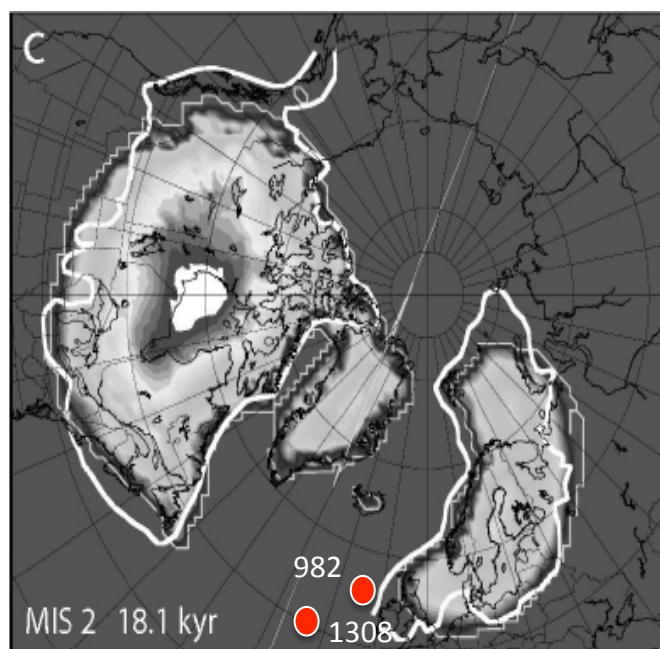

figS06

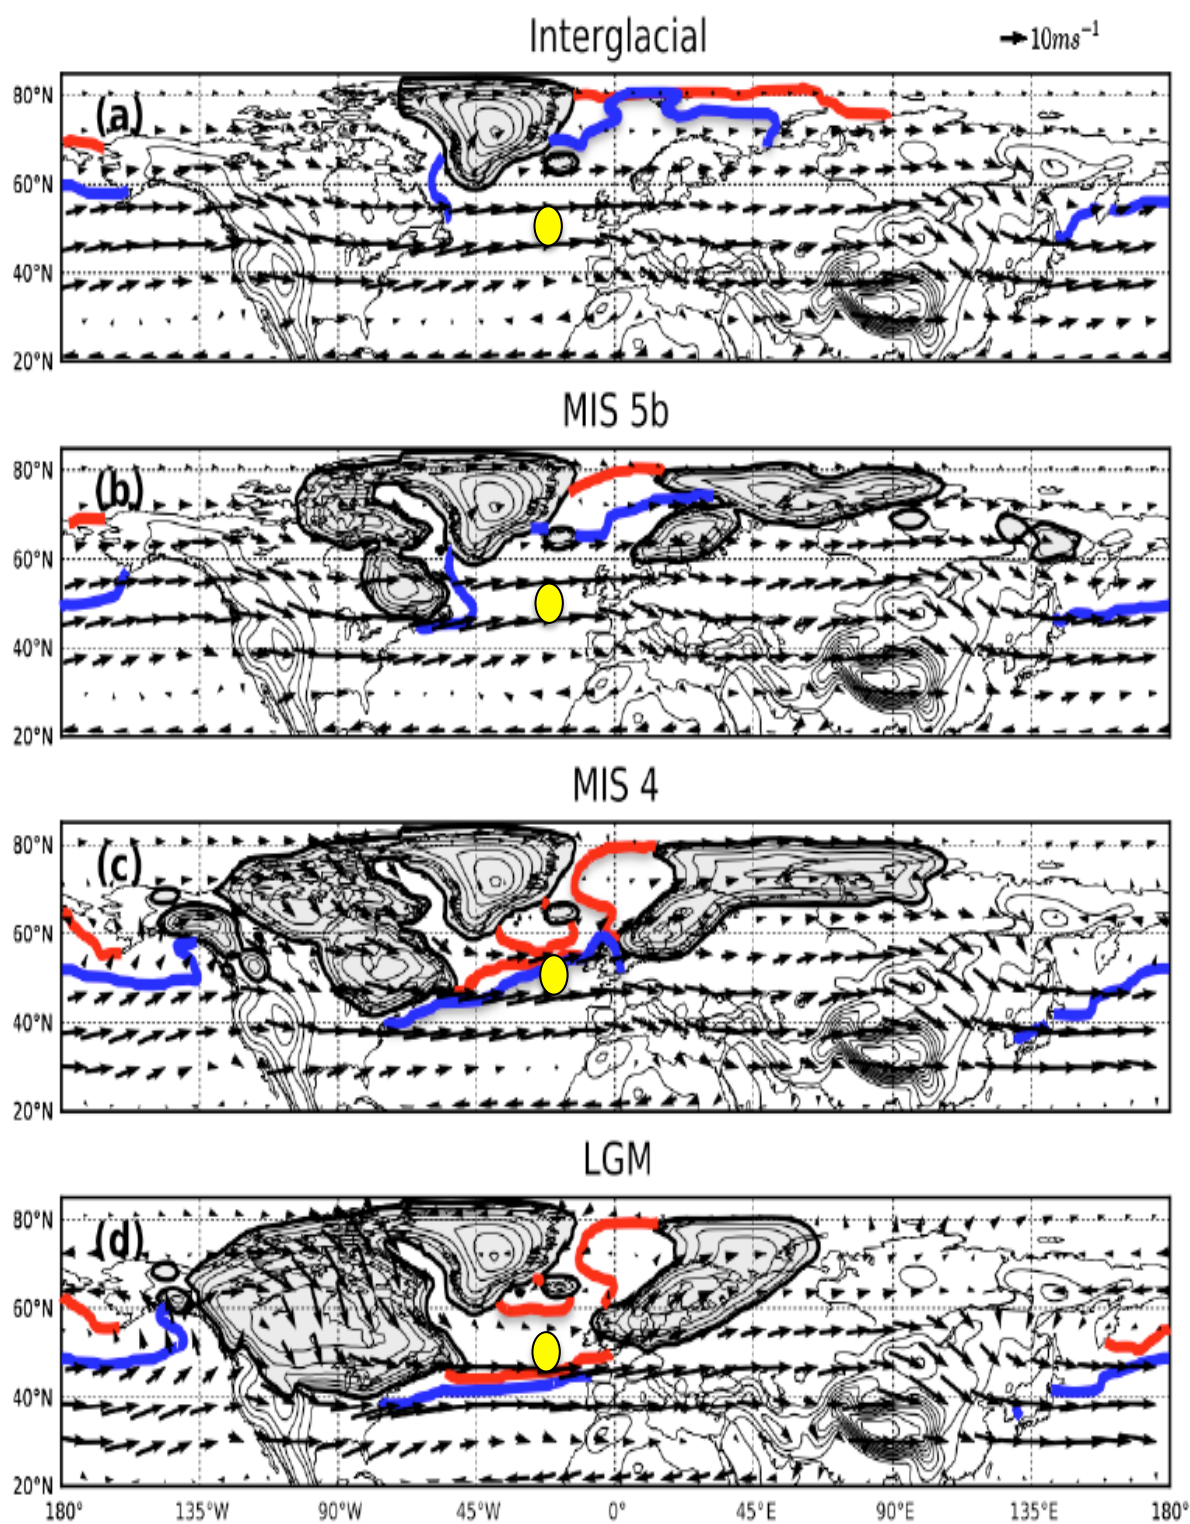

figS07
